# Supplementary material for: A general approach to identify low-frequency variants within influenza samples collected during routine surveillance
Source: PubMed Central journal article supplement (PMC9676042; doi:10.1099/mgen.0.000867), 2022-09-28
Supplement: mgen-8-867-s001.pdf [file mgen-8-867-s001.pdf]

**Table S1: Primers used for Sanger sequencing to verify the sequences of the mutant A(H1N1)pmd09 and A(H3N2) NA-plasmids**

|                      |                          |
|----------------------|--------------------------|
| <b>pRF-CMV Fw</b>    | GATAGCGGTTTGACTCACG      |
| <b>H3N2sNA-2f</b>    | GCAAAAAGCAGGAGTAAAGATGAA |
| <b>H3N2sNA-418f</b>  | CCTTGGACAGGGAACAAC       |
| <b>H3N2sNA-550f</b>  | ATGGTCCAGCTCAAGTTGTCA    |
| <b>H3N2sNA-645R</b>  | CCATCGTAAATGAAGCTAGC     |
| <b>H3N2sNA-1436r</b> | CGAAAGCTTATATAGGCATGAGA  |
| <b>pRF-polyA-Rv</b>  | CTCTAGCATTAGGTGACC       |
| <b>H1N1pNA-7f</b>    | AGCAGGAGTTTAAAATGAATCC   |
| <b>H1N1pNA-459f</b>  | GGAACCATTAAAGACAGGAGC    |
| <b>H1N1pNA-642r</b>  | ACTTTAACACAGCCACTGC      |
| <b>H1N1pNA-1070f</b> | ATTCAAATACGGCAATGGTG     |
| <b>H1N1pNA-1425r</b> | TGTCAATGGTAAATGGCAACTC   |

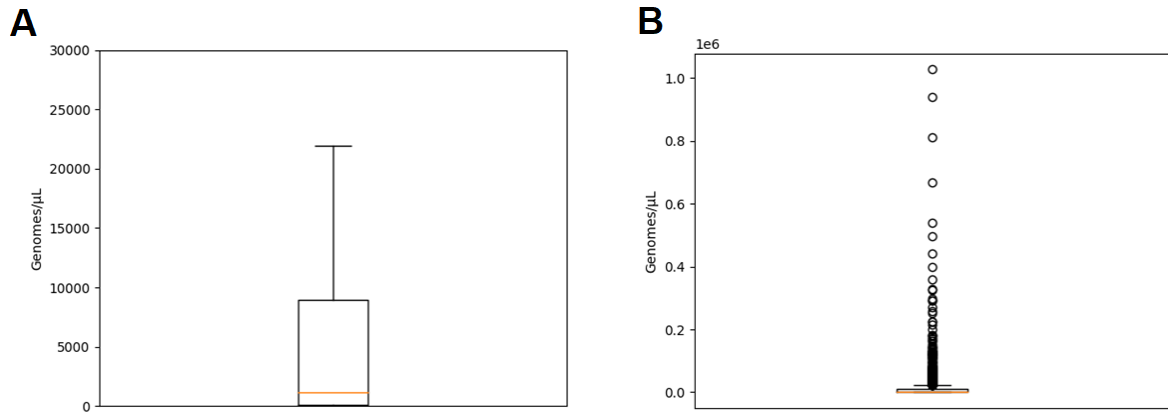

**Figure S1: Boxplot of A(H3N2) positive influenza samples from the influenza seasons 2015-2019 in Belgium without (A) and with (B) outliers.** The median of 1273 A(H3N2) positive influenza samples was 1168.85 genomes/μL (IQR: 88.70-8907.89 genomes/μL) was 1168.85 genomes/μL (IQR: 88.70–8907.89 genomes/μL).

**Table S2: Information on the McCrone samples.** This table includes the sample names used internally, SRA accession number, and the genomic titer and the targeted AF of that particular sample.

| Sample name                    | SRA accession | Genomic titer (genomes/ $\mu$ l) | Targeted AF |
|--------------------------------|---------------|----------------------------------|-------------|
| SRR3360142-titer-10-4-freq-0-2 | SRR3360142    | $10^4$                           | 0.2         |
| SRR3360143-titer-10-4-freq-0-5 | SRR3360143    | $10^4$                           | 0.5         |
| SRR3360144-titer-10-4-freq-1   | SRR3360144    | $10^4$                           | 1           |
| SRR3359622-titer-10-4-freq-2   | SRR3359622    | $10^4$                           | 2           |
| SRR3359623-titer-10-4-freq-5   | SRR3359623    | $10^4$                           | 5           |
| SRR3359624-titer-10-5-freq-0-2 | SRR3359624    | $10^5$                           | 0.2         |
| SRR3359625-titer-10-5-freq-0-5 | SRR3359625    | $10^5$                           | 0.5         |
| SRR3359626-titer-10-5-freq-1   | SRR3359626    | $10^5$                           | 1           |
| SRR3359627-titer-10-5-freq-2   | SRR3359627    | $10^5$                           | 2           |
| SRR3359628-titer-10-5-freq-5   | SRR3359628    | $10^5$                           | 5           |
| SRR3360149-titer-10-3-freq-0-2 | SRR3360149    | $10^3$                           | 0.2         |
| SRR3360150-titer-10-3-freq-0-5 | SRR3360150    | $10^3$                           | 0.5         |
| SRR3360151-titer-10-3-freq-1   | SRR3360151    | $10^3$                           | 1           |
| SRR3360152-titer-10-3-freq-2   | SRR3360152    | $10^3$                           | 2           |
| SRR3360141-titer-10-3-freq-5   | SRR3360141    | $10^3$                           | 5           |

**Table S3: Samples of experimental quasi-species for A(H3N2) and A(H1N1)p subtypes and accession numbers.** For each sample the subtype, expected WT AF at the mutated positions, proportion of WT and mutated material introduced in the mix, replicate number, Biosample and SRA accession numbers are provided.

| Sample_Name                 | Influenza subtype | Percentage WT | Percentage MUT | Replicate | Biosample accession number | SRA accession number |
|-----------------------------|-------------------|---------------|----------------|-----------|----------------------------|----------------------|
| 1.1_WGS_H1N1p_0_100_Mix1    | H1N1p             | 0             | 100            | 1         | SAMN17326320               | SRS8037855           |
| 1.2_WGS_H1N1p_0_100_Mix2    | H1N1p             | 0             | 100            | 2         | SAMN17326321               | SRS8037856           |
| 1.3_WGS_H1N1p_0_100_Mix3    | H1N1p             | 0             | 100            | 3         | SAMN17326322               | SRS8037867           |
| 1.4_WGS_H1N1p_80_20_Mix1    | H1N1p             | 80            | 20             | 1         | SAMN17326323               | SRS8037878           |
| 1.5_WGS_H1N1p_80_20_Mix2    | H1N1p             | 80            | 20             | 2         | SAMN17326324               | SRS8037889           |
| 1.6_WGS_H1N1p_80_20_Mix3    | H1N1p             | 80            | 20             | 3         | SAMN17326325               | SRS8037898           |
| 1.7_WGS_H1N1p_90_10_Mix1    | H1N1p             | 90            | 10             | 1         | SAMN17326326               | SRS8037899           |
| 1.8_WGS_H1N1p_90_10_Mix2    | H1N1p             | 90            | 10             | 2         | SAMN17326327               | SRS8037900           |
| 2.1_WGS_H1N1p_90_10_Mix3    | H1N1p             | 90            | 10             | 3         | SAMN17326328               | SRS8037901           |
| 2.2_WGS_H1N1p_95_5_Mix1     | H1N1p             | 95            | 5              | 1         | SAMN17326329               | SRS8037902           |
| 2.3_WGS_H1N1p_95_5_Mix2     | H1N1p             | 95            | 5              | 2         | SAMN17326330               | SRS8037857           |
| 2.4_WGS_H1N1p_95_5_Mix3     | H1N1p             | 95            | 5              | 3         | SAMN17326331               | SRS8037858           |
| 2.5_WGS_H1N1p_99_1_Mix1     | H1N1p             | 99            | 1              | 1         | SAMN17326332               | SRS8037859           |
| 2.6_WGS_H1N1p_99_1_Mix2     | H1N1p             | 99            | 1              | 2         | SAMN17326333               | SRS8037860           |
| 2.7_WGS_H1N1p_99_1_Mix3     | H1N1p             | 99            | 1              | 3         | SAMN17326334               | SRS8037861           |
| 2.8_WGS_H1N1p_99.5_0.5_Mix1 | H1N1p             | 99,5          | 0,5            | 1         | SAMN17326335               | SRS8037862           |
| 3.1_WGS_H1N1p_99.5_0.5_Mix2 | H1N1p             | 99,5          | 0,5            | 2         | SAMN17326336               | SRS8037863           |
| 3.2_WGS_H1N1p_99.5_0.5_Mix3 | H1N1p             | 99,5          | 0,5            | 3         | SAMN17326337               | SRS8037864           |
| 3.3_WGS_H1N1p_99.9_0.1_Mix1 | H1N1p             | 99,9          | 0,1            | 1         | SAMN17326338               | SRS8037865           |
| 3.4_WGS_H1N1p_99.9_0.1_Mix2 | H1N1p             | 99,9          | 0,1            | 2         | SAMN17326339               | SRS8037866           |
| 3.5_WGS_H1N1p_99.9_0.1_Mix3 | H1N1p             | 99,9          | 0,1            | 3         | SAMN17326340               | SRS8037868           |
| 3.6_WGS_H1N1p_100_0_Mix1    | H1N1p             | 100           | 0              | 1         | SAMN17326341               | SRS8037869           |
| 3.7_WGS_H1N1p_100_0_Mix2    | H1N1p             | 100           | 0              | 2         | SAMN17326342               | SRS8037870           |
| 3.8_WGS_H1N1p_100_0_Mix3    | H1N1p             | 100           | 0              | 3         | SAMN17326343               | SRS8037871           |
| 4.1_WGS_H3N2_0_100_Mix1     | H3N2              | 0             | 100            | 1         | SAMN17326344               | SRS8037872           |
| 4.2_WGS_H3N2_0_100_Mix2     | H3N2              | 0             | 100            | 2         | SAMN17326345               | SRS8037873           |
| 4.3_WGS_H3N2_0_100_Mix3     | H3N2              | 0             | 100            | 3         | SAMN17326346               | SRS8037874           |
| 4.4_WGS_H3N2_80_20_Mix1     | H3N2              | 80            | 20             | 1         | SAMN17326347               | SRS8037875           |
| 4.5_WGS_H3N2_80_20_Mix2     | H3N2              | 80            | 20             | 2         | SAMN17326348               | SRS8037876           |
| 4.6_WGS_H3N2_80_20_Mix3     | H3N2              | 80            | 20             | 3         | SAMN17326349               | SRS8037877           |
| 4.7_WGS_H3N2_90_10_Mix1     | H3N2              | 90            | 10             | 1         | SAMN17326350               | SRS8037879           |
| 4.8_WGS_H3N2_90_10_Mix2     | H3N2              | 90            | 10             | 2         | SAMN17326351               | SRS8037880           |
| 5.1_WGS_H3N2_95_5_Mix1      | H3N2              | 95            | 5              | 1         | SAMN17326354               | SRS8037883           |
| 5.2_WGS_H3N2_95_5_Mix2      | H3N2              | 95            | 5              | 2         | SAMN17326355               | SRS8037884           |
| 5.3_WGS_H3N2_95_5_Mix3      | H3N2              | 95            | 5              | 3         | SAMN17326353               | SRS8037882           |
| 5.4_WGS_H3N2_99_1_Mix1      | H3N2              | 99            | 1              | 1         | SAMN17326357               | SRS8037886           |
| 5.5_WGS_H3N2_99_1_Mix2      | H3N2              | 99            | 1              | 2         | SAMN17326358               | SRS8037887           |
| 5.6_WGS_H3N2_99_1_Mix3      | H3N2              | 99            | 1              | 3         | SAMN17326356               | SRS8037885           |

|                            |      |      |     |   |              |            |
|----------------------------|------|------|-----|---|--------------|------------|
| 5.7_WGS_H3N2_99.5_0.5_Mix1 | H3N2 | 99,5 | 0,5 | 1 | SAMN17326360 | SRS8037890 |
| 5.8_WGS_H3N2_99.5_0.5_Mix2 | H3N2 | 99,5 | 0,5 | 2 | SAMN17326361 | SRS8037891 |
| 6.1_WGS_H3N2_99.5_0.5_Mix3 | H3N2 | 99,5 | 0,5 | 3 | SAMN17326359 | SRS8037888 |
| 6.2_WGS_H3N2_99.9_0.1_Mix1 | H3N2 | 99,9 | 0,1 | 1 | SAMN17326363 | SRS8037893 |
| 6.3_WGS_H3N2_99.9_0.1_Mix2 | H3N2 | 99,9 | 0,1 | 2 | SAMN17326364 | SRS8037894 |
| 6.4_WGS_H3N2_99.9_0.1_Mix3 | H3N2 | 99,9 | 0,1 | 3 | SAMN17326362 | SRS8037892 |
| 6.5_WGS_H3N2_100_0_Mix1    | H3N2 | 100  | 0   | 1 | SAMN17326366 | SRS8037896 |
| 6.6_WGS_H3N2_100_0_Mix2    | H3N2 | 100  | 0   | 2 | SAMN17326367 | SRS8037897 |
| 6.7_WGS_H3N2_100_0_Mix3    | H3N2 | 100  | 0   | 3 | SAMN17326365 | SRS8037895 |
| 6.8_WGS_H3N2_90_10_Mix3    | H3N2 | 90   | 10  | 3 | SAMN17326352 | SRS8037881 |

**Table S4: Wild-type (WT) and mutant (MUT) viruses were mixed according to percentages used for the phenotypic assays for A(H1N1)pdm09 and A(H3N2). Values for constructed mixes were verified with ddPCR for A(H3N2).**

|              | WT          |        | MUT         |        |
|--------------|-------------|--------|-------------|--------|
|              | Theoretical | ddPCR  | Theoretical | ddPCR  |
| <b>Mix 1</b> | 0%          | 0.34%  | 100%        | 99.66% |
| <b>Mix 2</b> | 80%         | 71.20% | 20%         | 28.80% |
| <b>Mix 3</b> | 90%         | 83.39% | 10%         | 16.61% |
| <b>Mix 4</b> | 95%         | 90.94% | 5%          | 9.06%  |
| <b>Mix 5</b> | 99%         | 98.11% | 1%          | 1.89%  |
| <b>Mix 6</b> | 99.5%       | 99.04% | 0.5%        | 0.96%  |
| <b>Mix 7</b> | 99.9%       | 99.76% | 0.1%        | 0.24%  |
| <b>Mix 8</b> | 100%        | 99.93% | 0%          | 0.07%  |

## Supplementary Method S1: RT-ddPCR method

The digital droplet PCR was performed using the One-Step RT-ddPCR Advanced Kit for Probes (Bio-Rad) according to the manufacturer's instructions, except that the mix was vortexed for 30 seconds at maximal speed after thawing and between every step the mix was vortexed for 10 seconds at maximal speed. Each reaction had a total volume of 22  $\mu\text{L}$  that was set up on ice, including 0.99  $\mu\text{L}$  of each primer with an initial concentration of 20  $\mu\text{M}$  (H3N2\_E119V\_FW\_Primer 5'-AGGACAATTCGATTAGGCTTTCC-3'; H3N2\_E119V\_RV\_Primer 5'-CTGTCCAAGGGCAAATTGAT-3') and 0.55  $\mu\text{L}$  of each probe with an initial concentration of 10  $\mu\text{M}$  (H3N2\_E119\_probe FAM-ACA AGA GAA CCT TAT G-MGB-Eclipse; H3N2\_V119\_probe HEX-ACA AGA GTA CCT TAT G-MGB-Eclipse), 1.1  $\mu\text{L}$  of 300 mM DTT, 8.12  $\mu\text{L}$  of  $\text{dH}_2\text{O}$ , 2.2  $\mu\text{L}$  Reverse Transcriptase, 5.5  $\mu\text{L}$  One-Step Supermix and 2  $\mu\text{L}$  of diluted sample (1:100). According to manufacturer's instructions, 20  $\mu\text{L}$  of the sample mix and 70  $\mu\text{L}$  of Droplet Generation Oil for Probes were loaded into a QX200™ droplet generator (Bio-Rad). After the droplet generation, 40  $\mu\text{L}$  of droplets was recovered per reaction. The RT-PCR amplification reaction was performed in a T100™ Thermal Cycler (Bio-Rad) with the following conditions: one cycle at 50°C for 60 minutes (RT), one cycle at 95°C for 15 minutes (Taq polymerase activation); 40 cycles at 95°C for 30 seconds (denaturation), 55°C for 60 seconds (annealing); and one cycle at 98°C for 10 minutes (enzyme inactivation). Afterwards, the plate was transferred to the QX200 reader (Bio-Rad) and results were acquired using the HEX and FAM channel, according to the manufacturer's instructions. For the interpretation of the results, the QuantaSoft software v1.7.4.0917 (Bio-Rad) was used and the threshold was set manually.

**Table S5: List of accession numbers of A(H3N2) dataset and copy number.** For each sample the GISAID and SRA accession numbers are given in addition to the copy number.

| Isolate_Name         | GISAID_Isolate_ID | SRA_Study_Accession | SRA_Sample_Accession | SRA_Experiment_Accession | Copy number (genomes/ $\mu$ L) |
|----------------------|-------------------|---------------------|----------------------|--------------------------|--------------------------------|
| A/Belgium/G0007/2017 | EPI_ISL_415204    | SRP254509           | SRS6396338           | SRX8023650               | 18962.59                       |
| A/Belgium/G0020/2017 | EPI_ISL_415205    | SRP254509           | SRS6396349           | SRX8023661               | 33709.52                       |
| A/Belgium/G0027/2017 | EPI_ISL_415207    | SRP254509           | SRS6396411           | SRX8023724               | 78525.22                       |
| A/Belgium/G0051/2017 | EPI_ISL_415215    | SRP254509           | SRS6396356           | SRX8023668               | 23345.69                       |
| A/Belgium/G0076/2017 | EPI_ISL_415222    | SRP254509           | SRS6396473           | SRX8023785               | 15190.36                       |
| A/Belgium/G0088/2017 | EPI_ISL_415223    | SRP254509           | SRS6396318           | SRX8023630               | 32336.33                       |
| A/Belgium/G0125/2017 | EPI_ISL_415228    | SRP254509           | SRS6396253           | SRX8023565               | 97348.32                       |
| A/Belgium/G0219/2017 | EPI_ISL_415234    | SRP254509           | SRS6396260           | SRX8023572               | 48337.94                       |
| A/Belgium/G0254/2017 | EPI_ISL_415241    | SRP254509           | SRS6396269           | SRX8023581               | 16854.76                       |
| A/Belgium/G0369/2017 | EPI_ISL_415260    | SRP254509           | SRS6396395           | SRX8023707               | 72760.53                       |
| A/Belgium/G0373/2017 | EPI_ISL_415261    | SRP254509           | SRS6396396           | SRX8023708               | 14672.92                       |
| A/Belgium/G0412/2017 | EPI_ISL_415266    | SRP254509           | SRS6396403           | SRX8023715               | 66490.86                       |
| A/Belgium/G0437/2017 | EPI_ISL_415272    | SRP254509           | SRS6396409           | SRX8023721               | 15835.43                       |
| A/Belgium/G0438/2017 | EPI_ISL_415273    | SRP254509           | SRS6396410           | SRX8023722               | 14173.11                       |
| A/Belgium/G0453/2017 | EPI_ISL_415278    | SRP254509           | SRS6396437           | SRX8023750               | 22086.37                       |
| A/Belgium/S0021/2017 | EPI_ISL_415292    | SRP254509           | SRS6396449           | SRX8023761               | 811858.28                      |
| A/Belgium/S0036/2017 | EPI_ISL_415294    | SRP254509           | SRS6396452           | SRX8023763               | 68360.17                       |
| A/Belgium/S0069/2017 | EPI_ISL_415296    | SRP254509           | SRS6396453           | SRX8023765               | 1027614.98                     |
| A/Belgium/S0093/2017 | EPI_ISL_415298    | SRP254509           | SRS6396455           | SRX8023767               | 30380.72                       |
| A/Belgium/S0098/2017 | EPI_ISL_415299    | SRP254509           | SRS6396270           | SRX8023582               | 75850.36                       |
| A/Belgium/S0150/2017 | EPI_ISL_415305    | SRP254509           | SRS6396276           | SRX8023588               | 400340.60                      |
| A/Belgium/S0275/2017 | EPI_ISL_415312    | SRP254509           | SRS6396284           | SRX8023596               | 47343.16                       |
| A/Belgium/S0281/2017 | EPI_ISL_415313    | SRP254509           | SRS6396285           | SRX8023597               | 18962.59                       |
| A/Belgium/S0365/2017 | EPI_ISL_415320    | SRP254509           | SRS6396293           | SRX8023605               | 19905.35                       |
| A/Belgium/S0424/2017 | EPI_ISL_415329    | SRP254509           | SRS6396303           | SRX8023615               | 12597.66                       |
| A/Belgium/S0447/2017 | EPI_ISL_415333    | SRP254509           | SRS6396307           | SRX8023619               | 23671.58                       |
| A/Belgium/S0457/2017 | EPI_ISL_415338    | SRP254509           | SRS6396228           | SRX8023540               | 66490.86                       |
| A/Belgium/S0460/2017 | EPI_ISL_415340    | SRP254509           | SRS6396231           | SRX8023543               | 72760.53                       |
| A/Belgium/S0494/2017 | EPI_ISL_415346    | SRP254509           | SRS6396237           | SRX8023549               | 21782.30                       |
| A/Belgium/S0499/2017 | EPI_ISL_415347    | SRP254509           | SRS6396238           | SRX8023550               | 11835.79                       |
| A/Belgium/S0513/2017 | EPI_ISL_415351    | SRP254509           | SRS6396243           | SRX8023555               | 11197.34                       |
| A/Belgium/S0544/2017 | EPI_ISL_415355    | SRP254509           | SRS6396247           | SRX8023559               | 14672.92                       |
| A/Belgium/S0549/2017 | EPI_ISL_415356    | SRP254509           | SRS6396248           | SRX8023560               | 9952.67                        |
| A/Belgium/S0553/2017 | EPI_ISL_415359    | SRP254509           | SRS6396357           | SRX8023669               | 15402.41                       |
| A/Belgium/S0587/2017 | EPI_ISL_415362    | SRP254509           | SRS6396360           | SRX8023672               | 19495.70                       |
| A/Belgium/S0724/2017 | EPI_ISL_415371    | SRP254509           | SRS6396370           | SRX8023682               | 115767.31                      |
| A/Belgium/S0725/2017 | EPI_ISL_415372    | SRP254509           | SRS6396371           | SRX8023683               | 246438.54                      |
| A/Belgium/S0772/2017 | EPI_ISL_415379    | SRP254509           | SRS6396379           | SRX8023691               | 138628.89                      |
| A/Belgium/S0785/2017 | EPI_ISL_415383    | SRP254509           | SRS6396383           | SRX8023695               | 23671.58                       |
| A/Belgium/S0836/2017 | EPI_ISL_415389    | SRP254509           | SRS6396390           | SRX8023702               | 29549.96                       |
| A/Belgium/S0891/2017 | EPI_ISL_415397    | SRP254509           | SRS6396419           | SRX8023731               | 228347.01                      |



|                             |                |           |            |            |           |
|-----------------------------|----------------|-----------|------------|------------|-----------|
| <b>A/Belgium/S0896/2017</b> | EPI_ISL_415399 | SRP254509 | SRS6396422 | SRX8023735 | 21040.31  |
| <b>A/Belgium/S0910/2017</b> | EPI_ISL_415401 | SRP254509 | SRS6396425 | SRX8023737 | 27955.96  |
| <b>A/Belgium/S0921/2017</b> | EPI_ISL_415404 | SRP254509 | SRS6396428 | SRX8023740 | 10375.32  |
| <b>A/Belgium/S0931/2017</b> | EPI_ISL_415405 | SRP254509 | SRS6396429 | SRX8023741 | 752258.19 |
| <b>A/Belgium/S0938/2017</b> | EPI_ISL_415406 | SRP254509 | SRS6396430 | SRX8023742 | 36128.97  |
| <b>A/Belgium/S1006/2017</b> | EPI_ISL_415411 | SRP254509 | SRS6396436 | SRX8023748 | 45730.48  |
| <b>A/Belgium/S1029/2017</b> | EPI_ISL_415413 | SRP254509 | SRS6396457 | SRX8023768 | 54007.36  |
| <b>A/Belgium/S1055/2017</b> | EPI_ISL_415415 | SRP254509 | SRS6396458 | SRX8023770 | 11672.84  |
| <b>A/Belgium/S1118/2017</b> | EPI_ISL_415421 | SRP254509 | SRS6396465 | SRX8023777 | 52895.90  |
| <b>A/Belgium/S1166/2017</b> | EPI_ISL_415424 | SRP254509 | SRS6396468 | SRX8023780 | 16854.76  |
| <b>A/Belgium/S1191/2017</b> | EPI_ISL_415428 | SRP254509 | SRS6396472 | SRX8023784 | 86527.34  |
| <b>A/Belgium/S1199/2017</b> | EPI_ISL_415430 | SRP254509 | SRS6396474 | SRX8023787 | 137671.31 |
| <b>A/Belgium/S1247/2017</b> | EPI_ISL_415433 | SRP254509 | SRS6396312 | SRX8023624 | 35631.57  |
| <b>A/Belgium/S1264/2017</b> | EPI_ISL_415436 | SRP254509 | SRS6396314 | SRX8023626 | 30170.86  |
| <b>A/Belgium/S1266/2017</b> | EPI_ISL_415437 | SRP254509 | SRS6396315 | SRX8023627 | 100781.30 |
| <b>A/Belgium/S1268/2017</b> | EPI_ISL_415438 | SRP254509 | SRS6396316 | SRX8023628 | 37403.05  |
| <b>A/Belgium/S1306/2017</b> | EPI_ISL_415440 | SRP254509 | SRS6396319 | SRX8023631 | 110284.34 |
| <b>A/Belgium/S1430/2017</b> | EPI_ISL_415450 | SRP254509 | SRS6396330 | SRX8023642 | 297157.53 |

**Table S6: Reads deduplication statistics for all samples (produced during reads deduplication by Picard MarkDuplicates).** For each sample the internal name, number of unpaired reads or pair reads examined, number of unpaired reads and read pair marked as duplicates, number of read pair optical duplicates and total percentage of read duplication are provided.

| Sample or Isolate Name      | Unpaired reads examined | Read pairs examined | Unpaired reads duplicates | Read pairs duplicates | Read pair optical duplicates | Proportion of duplicated reads |
|-----------------------------|-------------------------|---------------------|---------------------------|-----------------------|------------------------------|--------------------------------|
| 1.1_WGS_H1N1p_0_100_Mix1    | 4500                    | 309369              | 4481                      | 111259                | 43                           | 0.364225                       |
| 1.2_WGS_H1N1p_0_100_Mix2    | 5468                    | 487609              | 5458                      | 199751                | 46                           | 0.412935                       |
| 1.3_WGS_H1N1p_0_100_Mix3    | 3824                    | 297716              | 3802                      | 101308                | 38                           | 0.344457                       |
| 1.4_WGS_H1N1p_80_20_Mix1    | 4729                    | 271078              | 4703                      | 91120                 | 33                           | 0.341832                       |
| 1.5_WGS_H1N1p_80_20_Mix2    | 3902                    | 290758              | 3879                      | 102280                | 27                           | 0.356052                       |
| 1.6_WGS_H1N1p_80_20_Mix3    | 7941                    | 673629              | 7930                      | 328598                | 81                           | 0.490796                       |
| 1.7_WGS_H1N1p_90_10_Mix1    | 3129                    | 275642              | 3116                      | 93716                 | 24                           | 0.343693                       |
| 1.8_WGS_H1N1p_90_10_Mix2    | 3656                    | 237220              | 3642                      | 73778                 | 28                           | 0.31625                        |
| 2.1_WGS_H1N1p_90_10_Mix3    | 3281                    | 263228              | 3266                      | 86350                 | 25                           | 0.332176                       |
| 2.2_WGS_H1N1p_95_5_Mix1     | 6478                    | 529481              | 6463                      | 231933                | 51                           | 0.441441                       |
| 2.3_WGS_H1N1p_95_5_Mix2     | 7540                    | 528667              | 7521                      | 229575                | 80                           | 0.438241                       |
| 2.4_WGS_H1N1p_95_5_Mix3     | 1866                    | 103974              | 1834                      | 22024                 | 10                           | 0.218679                       |
| 2.5_WGS_H1N1p_99_1_Mix1     | 7559                    | 530329              | 7541                      | 233500                | 72                           | 0.444237                       |
| 2.6_WGS_H1N1p_99_1_Mix2     | 1956                    | 100136              | 1931                      | 20553                 | 14                           | 0.212814                       |
| 2.7_WGS_H1N1p_99_1_Mix3     | 3201                    | 232247              | 3181                      | 71638                 | 31                           | 0.313146                       |
| 2.8_WGS_H1N1p_99.5_0.5_Mix1 | 3958                    | 273650              | 3939                      | 91808                 | 32                           | 0.340231                       |
| 3.1_WGS_H1N1p_99.5_0.5_Mix2 | 8189                    | 421314              | 8168                      | 172589                | 46                           | 0.415302                       |
| 3.2_WGS_H1N1p_99.5_0.5_Mix3 | 5772                    | 304751              | 5748                      | 108477                | 45                           | 0.361956                       |
| 3.3_WGS_H1N1p_99.9_0.1_Mix1 | 6559                    | 324930              | 6539                      | 117287                | 43                           | 0.367316                       |
| 3.4_WGS_H1N1p_99.9_0.1_Mix2 | 7557                    | 331309              | 7532                      | 122707                | 49                           | 0.377433                       |
| 3.5_WGS_H1N1p_99.9_0.1_Mix3 | 5647                    | 302236              | 5623                      | 107686                | 46                           | 0.362216                       |
| 3.6_WGS_H1N1p_100_0_Mix1    | 2190                    | 122644              | 2162                      | 27476                 | 15                           | 0.230784                       |
| 3.7_WGS_H1N1p_100_0_Mix2    | 3619                    | 201324              | 3600                      | 60413                 | 28                           | 0.306267                       |
| 3.8_WGS_H1N1p_100_0_Mix3    | 6440                    | 337671              | 6418                      | 124044                | 40                           | 0.373295                       |
| 4.1_WGS_H3N2_0_100_Mix1     | 2835                    | 252471              | 2823                      | 85816                 | 24                           | 0.343566                       |
| 4.2_WGS_H3N2_0_100_Mix2     | 4397                    | 383119              | 4379                      | 151762                | 43                           | 0.399545                       |
| 4.3_WGS_H3N2_0_100_Mix3     | 3984                    | 351611              | 3969                      | 129777                | 30                           | 0.372626                       |
| 4.4_WGS_H3N2_80_20_Mix1     | 6369                    | 449986              | 6345                      | 193432                | 43                           | 0.433842                       |
| 4.5_WGS_H3N2_80_20_Mix2     | 1609                    | 135673              | 1592                      | 34127                 | 12                           | 0.255888                       |
| 4.6_WGS_H3N2_80_20_Mix3     | 4009                    | 343139              | 3993                      | 132255                | 50                           | 0.388973                       |
| 4.7_WGS_H3N2_90_10_Mix1     | 2316                    | 256251              | 2300                      | 88591                 | 34                           | 0.348632                       |
| 4.8_WGS_H3N2_90_10_Mix2     | 4976                    | 413805              | 4967                      | 168324                | 60                           | 0.410306                       |
| 5.1_WGS_H3N2_95_5_Mix1      | 2583                    | 272160              | 2568                      | 96555                 | 32                           | 0.357793                       |
| 5.2_WGS_H3N2_95_5_Mix2      | 3998                    | 251799              | 3986                      | 88375                 | 28                           | 0.356063                       |
| 5.3_WGS_H3N2_95_5_Mix3      | 5997                    | 435078              | 5979                      | 187564                | 65                           | 0.434978                       |
| 5.4_WGS_H3N2_99_1_Mix1      | 2674                    | 202600              | 2655                      | 63671                 | 29                           | 0.318719                       |
| 5.5_WGS_H3N2_99_1_Mix2      | 3016                    | 280476              | 3001                      | 101260                | 32                           | 0.36442                        |

|                            |       |        |       |        |    |          |
|----------------------------|-------|--------|-------|--------|----|----------|
| 5.6_WGS_H3N2_99_1_Mix3     | 3545  | 341961 | 3535  | 134258 | 44 | 0.39573  |
| 5.7_WGS_H3N2_99.5_0.5_Mix1 | 1699  | 181564 | 1687  | 54972  | 13 | 0.305983 |
| 5.8_WGS_H3N2_99.5_0.5_Mix2 | 3224  | 296595 | 3209  | 110498 | 40 | 0.375922 |
| 6.1_WGS_H3N2_99.5_0.5_Mix3 | 3859  | 224699 | 3837  | 72477  | 25 | 0.328271 |
| 6.2_WGS_H3N2_99.9_0.1_Mix1 | 4831  | 395180 | 4819  | 162343 | 44 | 0.414372 |
| 6.3_WGS_H3N2_99.9_0.1_Mix2 | 2794  | 208482 | 2778  | 62478  | 16 | 0.304304 |
| 6.4_WGS_H3N2_99.9_0.1_Mix3 | 8792  | 514200 | 8774  | 223072 | 52 | 0.438605 |
| 6.5_WGS_H3N2_100_0_Mix1    | 5285  | 313362 | 5268  | 117308 | 41 | 0.379558 |
| 6.6_WGS_H3N2_100_0_Mix2    | 2277  | 159866 | 2258  | 42451  | 16 | 0.270676 |
| 6.7_WGS_H3N2_100_0_Mix3    | 2180  | 179387 | 2160  | 50839  | 25 | 0.287677 |
| 6.8_WGS_H3N2_90_10_Mix3    | 2804  | 178785 | 2786  | 50493  | 22 | 0.287956 |
| A/Belgium/G0007/2017       | 2955  | 280862 | 2944  | 84048  | 40 | 0.302898 |
| A/Belgium/G0020/2017       | 4052  | 226418 | 4032  | 72722  | 26 | 0.327161 |
| A/Belgium/G0027/2017       | 3439  | 295058 | 3418  | 88498  | 47 | 0.303955 |
| A/Belgium/G0051/2017       | 1849  | 281773 | 1841  | 83249  | 40 | 0.297737 |
| A/Belgium/G0076/2017       | 3579  | 268075 | 3566  | 77239  | 38 | 0.292821 |
| A/Belgium/G0088/2017       | 2674  | 230566 | 2665  | 59001  | 39 | 0.260167 |
| A/Belgium/G0125/2017       | 2598  | 232995 | 2585  | 66008  | 25 | 0.287248 |
| A/Belgium/G0219/2017       | 3423  | 254600 | 3404  | 74408  | 27 | 0.296943 |
| A/Belgium/G0254/2017       | 7732  | 288137 | 7703  | 86980  | 23 | 0.311064 |
| A/Belgium/G0369/2017       | 12760 | 323600 | 12731 | 106427 | 38 | 0.341816 |
| A/Belgium/G0373/2017       | 4233  | 265963 | 4204  | 82715  | 29 | 0.316387 |
| A/Belgium/G0412/2017       | 3982  | 183146 | 3950  | 42760  | 14 | 0.241632 |
| A/Belgium/G0437/2017       | 2819  | 187439 | 2800  | 45614  | 24 | 0.248951 |
| A/Belgium/G0438/2017       | 4072  | 427612 | 4056  | 166079 | 53 | 0.391267 |
| A/Belgium/G0453/2017       | 2496  | 284421 | 2481  | 89191  | 35 | 0.31656  |
| A/Belgium/S0021/2017       | 7305  | 293888 | 7282  | 91082  | 32 | 0.318353 |
| A/Belgium/S0036/2017       | 8818  | 334187 | 8788  | 114017 | 44 | 0.349712 |
| A/Belgium/S0069/2017       | 4644  | 323824 | 4626  | 103804 | 43 | 0.325367 |
| A/Belgium/S0093/2017       | 6567  | 252741 | 6533  | 70557  | 42 | 0.288345 |
| A/Belgium/S0098/2017       | 6049  | 388207 | 6036  | 130208 | 48 | 0.34053  |
| A/Belgium/S0150/2017       | 2628  | 201476 | 2606  | 52479  | 35 | 0.26521  |
| A/Belgium/S0275/2017       | 4248  | 275884 | 4223  | 85000  | 41 | 0.313342 |
| A/Belgium/S0281/2017       | 7678  | 476481 | 7672  | 184949 | 71 | 0.39304  |
| A/Belgium/S0365/2017       | 3481  | 301741 | 3470  | 95691  | 51 | 0.321028 |
| A/Belgium/S0424/2017       | 7025  | 209274 | 6984  | 56904  | 24 | 0.283834 |
| A/Belgium/S0447/2017       | 3060  | 252041 | 3049  | 72597  | 45 | 0.292311 |
| A/Belgium/S0457/2017       | 3548  | 299845 | 3526  | 96133  | 43 | 0.324568 |
| A/Belgium/S0460/2017       | 6964  | 286555 | 6926  | 92178  | 40 | 0.329754 |
| A/Belgium/S0494/2017       | 6469  | 294070 | 6438  | 96723  | 29 | 0.33616  |
| A/Belgium/S0499/2017       | 6343  | 345135 | 6321  | 114296 | 62 | 0.337222 |
| A/Belgium/S0513/2017       | 4151  | 360691 | 4138  | 123355 | 52 | 0.345743 |
| A/Belgium/S0544/2017       | 4022  | 296933 | 4005  | 95433  | 49 | 0.325932 |
| A/Belgium/S0549/2017       | 3942  | 269068 | 3919  | 80212  | 36 | 0.303172 |
| A/Belgium/S0553/2017       | 4662  | 315309 | 4642  | 110759 | 41 | 0.356001 |
| A/Belgium/S0587/2017       | 6074  | 286056 | 6050  | 85279  | 40 | 0.305452 |

|                                |        |        |        |        |    |          |
|--------------------------------|--------|--------|--------|--------|----|----------|
| A/Belgium/S0724/2017           | 3280   | 216687 | 3256   | 57264  | 33 | 0.269742 |
| A/Belgium/S0725/2017           | 3835   | 292139 | 3824   | 88300  | 51 | 0.306785 |
| A/Belgium/S0772/2017           | 3736   | 262523 | 3722   | 76362  | 39 | 0.295861 |
| A/Belgium/S0785/2017           | 2741   | 233080 | 2723   | 65180  | 21 | 0.283819 |
| A/Belgium/S0836/2017           | 20582  | 292435 | 20520  | 103341 | 35 | 0.37526  |
| A/Belgium/S0891/2017           | 5324   | 263870 | 5291   | 80274  | 35 | 0.311105 |
| A/Belgium/S0896/2017           | 5833   | 269884 | 5810   | 79955  | 32 | 0.303738 |
| A/Belgium/S0910/2017           | 3548   | 231339 | 3529   | 64878  | 31 | 0.285881 |
| A/Belgium/S0921/2017           | 2619   | 282230 | 2603   | 86665  | 42 | 0.310244 |
| A/Belgium/S0931/2017           | 5883   | 229421 | 5852   | 64089  | 32 | 0.288407 |
| A/Belgium/S0938/2017           | 5667   | 302525 | 5642   | 100910 | 42 | 0.339702 |
| A/Belgium/S1006/2017           | 4699   | 291652 | 4680   | 89713  | 47 | 0.313104 |
| A/Belgium/S1029/2017           | 3385   | 330832 | 3376   | 109081 | 42 | 0.333115 |
| A/Belgium/S1055/2017           | 7333   | 464537 | 7312   | 175787 | 57 | 0.383259 |
| A/Belgium/S1118/2017           | 5057   | 332168 | 5038   | 105703 | 43 | 0.323344 |
| A/Belgium/S1166/2017           | 4019   | 258111 | 4001   | 73289  | 30 | 0.289441 |
| A/Belgium/S1191/2017           | 2862   | 300674 | 2848   | 99437  | 27 | 0.333861 |
| A/Belgium/S1199/2017           | 10553  | 242990 | 10500  | 72751  | 40 | 0.314183 |
| A/Belgium/S1247/2017           | 5104   | 273013 | 5089   | 81410  | 34 | 0.304663 |
| A/Belgium/S1264/2017           | 3996   | 293570 | 3980   | 90880  | 55 | 0.314209 |
| A/Belgium/S1266/2017           | 3806   | 303184 | 3786   | 94850  | 40 | 0.3171   |
| A/Belgium/S1268/2017           | 4077   | 216707 | 4055   | 61532  | 28 | 0.290564 |
| A/Belgium/S1306/2017           | 2177   | 247486 | 2155   | 74855  | 26 | 0.305472 |
| A/Belgium/S1430/2017           | 7955   | 243496 | 7926   | 68069  | 27 | 0.29107  |
| SRR3359628-titer-10-5-freq-5   | 169169 | 481234 | 168757 | 244728 | 0  | 0.581647 |
| SRR3359627-titer-10-5-freq-2   | 195524 | 617377 | 195177 | 312756 | 0  | 0.573797 |
| SRR3359626-titer-10-5-freq-1   | 173471 | 558251 | 173070 | 197453 | 0  | 0.440301 |
| SRR3359625-titer-10-5-freq-0-5 | 193528 | 537261 | 193070 | 248587 | 0  | 0.544335 |
| SRR3359624-titer-10-5-freq-0-2 | 184311 | 561859 | 183936 | 271777 | 0  | 0.556173 |
| SRR3359623-titer-10-4-freq-5   | 272632 | 656012 | 272349 | 349552 | 0  | 0.613037 |
| SRR3359622-titer-10-4-freq-2   | 161235 | 584577 | 160863 | 277214 | 0  | 0.537656 |
| SRR3360144-titer-10-4-freq-1   | 254470 | 821901 | 254120 | 417013 | 0  | 0.57323  |
| SRR3360143-titer-10-4-freq-0-5 | 175805 | 584433 | 175349 | 275578 | 0  | 0.540285 |
| SRR3360142-titer-10-4-freq-0-2 | 140718 | 456110 | 140216 | 208467 | 0  | 0.529138 |
| SRR3360141-titer-10-3-freq-5   | 234988 | 625451 | 234632 | 323177 | 0  | 0.592901 |
| SRR3360152-titer-10-3-freq-2   | 162102 | 574014 | 161693 | 251803 | 0  | 0.507811 |
| SRR3360151-titer-10-3-freq-1   | 280641 | 818789 | 280378 | 379307 | 0  | 0.541644 |
| SRR3360150-titer-10-3-freq-0-5 | 223102 | 652581 | 222704 | 277546 | 0  | 0.508941 |
| SRR3360149-titer-10-3-freq-0-2 | 246104 | 746181 | 245812 | 290214 | 0  | 0.47527  |

## **Supplementary Information S1: Evaluation of effects of reads deduplication on called variants counts**

PCR duplicate reads occur as a result of the randomness of selection of DNA molecules following PCR amplification prior to sequencing, which results in the same DNA molecule to be sequenced as multiple reads. The AF of called variants based on these reads may therefore not represent the actual AF of the variant in the biological sample, leading to an inflation or decrease in the AF of that variant, which, depending on the filtering method used, may result in the variant being considered or not as a true variant. PCR errors introduced in the amplified DNA may also be picked up as true variant, especially if they appear at an early PCR cycle and therefore are artificially enriched. Duplicate reads identification and removal aims at reducing the bias of representation of specific reads with respect to the original sequence.

The bioinformatics method that was used in the present work (Picard MarkDuplicates [1]) is based on the assumption that reads cover random stretches of the sequenced DNA and therefore should not start and end exactly at the same positions of the genome (using also the position of mate reads as information). Reads presenting the same 5' sequence are considered as putative duplicates, of which the one with maximal base quality score is chosen as representative read, whereas others are marked as duplicates. This process is sequence-agnostic and should therefore not specifically favour mutated or non-mutated reads [2, 3].

Deduplication metrics presented in supplementary table S6 show that between 21-61% of reads were removed during deduplication (average 36%). This does not lead us to believe that a major bias would be observed in the results. To verify this, variants called in deduplicated and non-deduplicated datasets were compared and we observed that 11% of variants called in the deduplicated data were not found in the non-deduplicated call set (523 out of 4934) and 12% of variants called in the non-deduplicated data were not found in the variants from deduplicated data (629 out of 5040). Of the variants that had an AF > 5%, 2.0% of variants called from the deduplicated data were unique to that call set (16 out of 801) and 5.3% of

variants called from the non deduplicated data were unique to that call set (44 out of 829). Three samples accounted for five variants unique to the deduplicated call set and 25 variants unique to the non-deduplicated call set, indicating a potential effect of the samples rather than a systematic bias caused by reads deduplication, especially as these samples were part of the most mutated samples before AF filtering. The majority of variants differentially called in the filtered datasets were called in both sets of the unfiltered datasets, indicating overall a minor variation of the observed AF rather than a major bias in variant calling due to deduplication of the reads. These results indicate that although a noticeable amount of variants were differentially called with and without reads deduplication at AF values below the threshold chosen for inclusion of variants (observed AF = 5%), no strong bias was observed towards one or the other, and noticeably, few variants were called in only the deduplicated or non-deduplicated data.

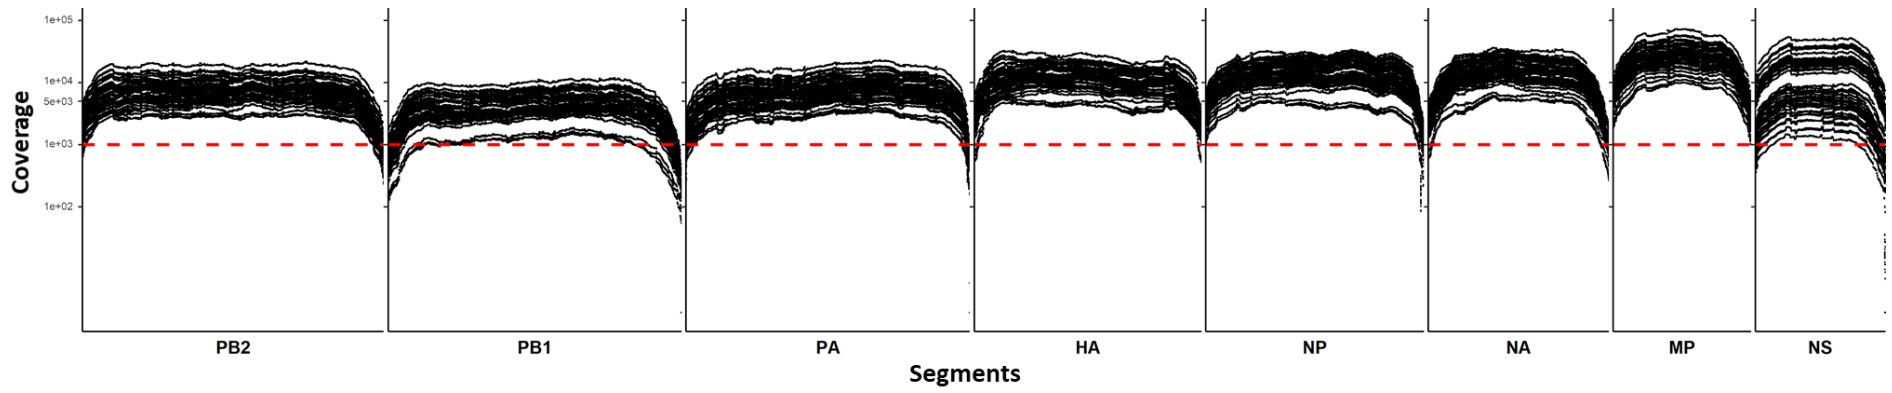

**Figure S2:** Coverage depth and breadth for the sequenced Influenza A(H3N2) samples using WGS stratified per segment. Coverage depth and gene segment position are presented on the y-axis and x-axis respectively. Every line represents one sample. The red dotted line represents a coverage depth of 1000x.

## 1 **Supplementary Information S2: Correlation of allelic frequency and** 2 **mix ratios to discard newly acquired variants**

3 To determine whether unexpected variants of high allelic frequency (AF) were false positives  
4 or variants that evolved during virus amplification and should be discarded from the analysis,  
5 we evaluate the relation between observed and expected AF by way of a linear regression.  
6 Since genomic material was not initial mixed at the perfect ratios, the initial relative abundance  
7 of mutated material compared to WT material was estimated based on the observed AF of  
8 inserted variants in the material at varying mix ratios. For both virus species (H1N1 and H3N2),  
9 the expected AF for each variant at each mix ratio was therefore calculated based on an  
10 estimate of the initial mutant relative abundance:

$$11 \quad \text{exp\_AF} = \frac{\text{mut\_abund} \times \text{ratio}}{((\text{mut\_abund} \times \text{ratio}) + (\text{WT\_abund} \times (1 - \text{ratio})))}$$

12 where WT\_abund was the relative abundance of WT and was equal to 1 and ratio was the mix  
13 ratio. The mutant relative abundances were 1.27 and 2.43 for H1N1 and H2N3, respectively  
14 and were calculated as the average of mutation abundances calculated for all inserted variants  
15 and with an observed AF of at least 5%, as follows:

$$16 \quad \text{mut\_abund} = \frac{(1 - \text{ratio}) \times \text{obs\_AF}}{(1 - \text{obs\_AF}) \times \text{ratio}}$$

17 where ratio was the mix ratio and obs\_AF was the observed AF of the variant at that mix ratio.

18 To assess the correlation between expected and observed AF, the coefficient of determination  
19 was used, which takes into account both the expected values of AF and the average of all  
20 expected values of AF, and thus allows to evaluate the slope of the linear regression. The  
21 coefficients of determination ( $R^2$ ) of observed AF of inserted variants compared to expected  
22 AF based on the calculations described above were of 0.95 and 0.99 for H3N2 and H1N1  
23 variants, respectively.



24  $R^2$  values above 0.90 were used to remove variants from the datasets of variants to further  
25 analyze. In cases where AF of variants could be either above or below 50%, variants were  
26 removed from the datasets if at least one of both cases (either variant called or WT) showed  
27  $R^2 > 0.5$  and the other case presented a variant AF compatible with the expected AF.

28 A further analysis on all variants (at high and low AF) identified two variants with a high  $R^2$   
29 value indicating potential TP status, both in H3N2 samples: HA-1040 A-G; NS-645 G-T, with  
30 a maximum AF of 2.7% and 2.3% respectively.

31 **Figure S3: Expected and observed AF of unexpected variants of non-low AF in benchmark datasets. (a)**  
32 Seven variants identified at high frequencies in H3N2 variants call-set and removed from the dataset of variants to  
33 analyse based on the high  $R^2$  value. **(b)** Seven variants identified at high frequencies in H1N1 variants call-set and  
34 removed from the dataset of variants to analyse based on the high  $R^2$  value.

a.

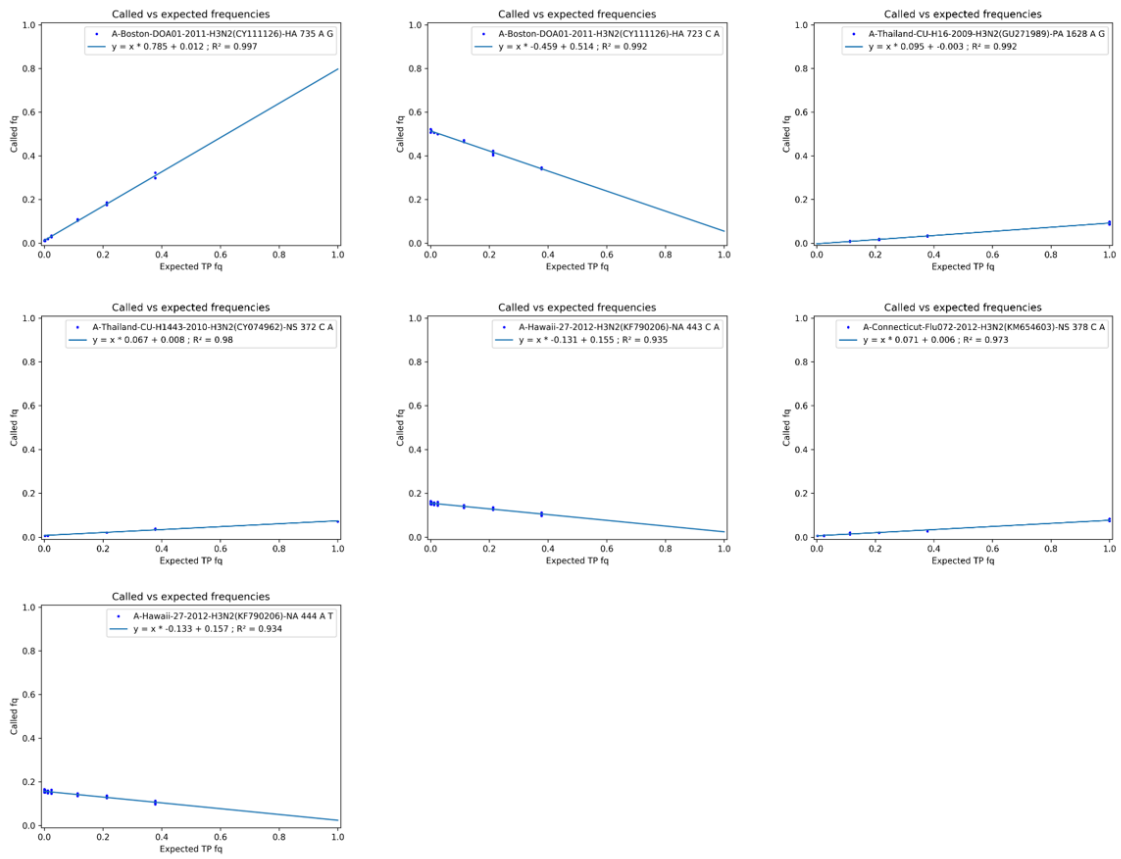

b.

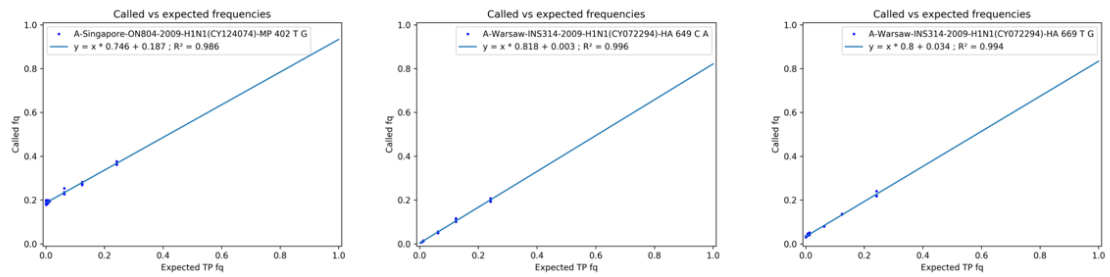

35

36

37

### 38 **Supplementary Information S3: A(H1N1) results**

39 An additional exploratory analysis was performed to evaluate if this 5% threshold could be  
40 applicable to another influenza A virus subtype. This was done using the influenza virus  
41 A/Bretagne/7608/2009 (A(H1N1)pdm09) (WT=1,378,182 copies/ $\mu$ L; MUT=1,716,364  
42 copies/ $\mu$ L). A dataset was created in triplicate, for which the ground truth was known, to  
43 validate a threshold for employed AF. The mutant included a specific mutation in the NA  
44 segment present at 100%, namely the well-known oseltamivir resistance mutation H275Y in  
45 the NA of A(H1N1)pdm09 virus [4], which served as markers when mixing the wild-type and  
46 mutant virus in different ratios. The presence of the mutation in the mutant virus was confirmed  
47 by conventional Sanger sequencing of the NA gene. The resulting mixes, and their triplicates,  
48 were then subjected to WGS, obtaining high coverage for all segments (see Supplementary  
49 Figure S1, supplementary Table S4), after which low-frequency variants were called with  
50 LoFreq. For A(H1N1)pdm09, no false positives (FP) and 50.00% of true positives (TP) were  
51 called at an AF of 3.04%. Decreasing the AF to obtain higher sensitivity immediately impaired  
52 a high cost in sensitivity. At an AF of 1%, 66.67% of TP (24/36) were recovered at a cost of 66  
53 FP for A(H1N1)pdm09. Maximum sensitivity (83.34%, 30/36) was obtained at an AF of 0.61%,  
54 but at the cost of 122 FP. This analysis, combined with the one of H3N2 sequencings, suggests  
55 that 5% is a stable and conservative cut-off (Supplementary Figure S4; Supplementary Table  
56 S7).

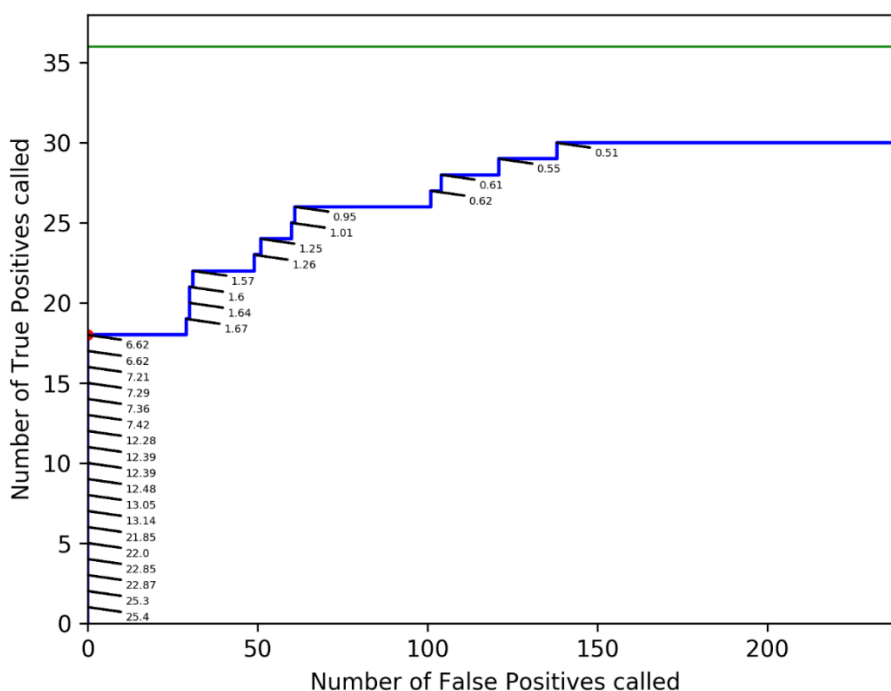

57

58 **Figure S4: ROC curve for A(H1N1)pdm09 strain.** The green curve represents a theoretical scenario where a  
 59 perfect variant caller identifies all 36 true positives before any false positive are called (i.e. perfect sensitivity and  
 60 specificity). The blue curve represents observed true positive and false positive counts in the benchmark datasets  
 61 for A(H1N1)pdm09 at variable thresholds for the AF at which variants were accepted. AF thresholds used to create  
 62 the ROC curve (AF of each true positive) are plotted in the figure. For A(H1N1)pdm09, no false positives and  
 63 50.00% of positives (18/36) were called at an AF of 6.62%. The first FP was called at a frequency of 2.86%. The  
 64 numbers of TP and FP expected when employing an AF threshold of 5% (respectively 18 and none) is depicted by  
 65 a red dot.

66 **Table S7: Performance of the workflow at varying allelic frequency thresholds.** True positive counts, False  
 67 positive counts, sensitivity and specificity of the workflow applied to the H1N1 datasets when using varying allelic  
 68 frequency thresholds. As was observed for the H3N2 datasets, reducing the AF threshold increases the sensitivity  
 69 and negatively affects the specificity. Again, although the specificity remains high due to the size of the negative  
 70 class (all positions in the genome which are not positives), the number of False positives increases dramatically at  
 71 lower AF, although exceeding the number of TP less than for the H3N2 datasets.

| AF (%) | Number of TP | Number of FP | Sensitivity (%) | Specificity (%) |
|--------|--------------|--------------|-----------------|-----------------|
| 10.0   | 11           | 0            | 33.56           | 100.00          |
| 5.0    | 17           | 0            | 47.22           | 100.00          |
| 2.0    | 18           | 19           | 50.00           | 99.99           |
| 1.0    | 24           | 60           | 66.67           | 99.98           |
| 0.5    | 30           | 138          | 83.33           | 99.95           |

72

## 73 **Supplementary Information S4: Individual nucleotide analysis**

### 74 **Methods**

75 A glm (link function = binomial) was used to assess the association between particular  
76 nucleotides at specific genomic positions with their associated frequency and patient data.  
77 Only positions where at least 10% of samples exhibited the presence of certain LFV, as well  
78 as the high-frequency variants (HFV), were retained. Positions where no variation between  
79 samples was observed (i.e. nucleotide was present at 0% or 100% at a specific position for all  
80 samples) were excluded from the analysis. Since fewer significant results than expected under  
81 the False Discovery Rate (FDR) null-hypothesis of uniformly distributed p-values were  
82 obtained, the real significances could not be modelled. Consequently, a more stringent p-value  
83 threshold of 0.01 was applied to reduce the number of false positive results. Given the 379  
84 nucleotides at certain positions that were interrogated for association with a clinical parameter,  
85 we only report clinical parameters having more significant associations than the four that are  
86 expected by chance at the alpha-level of 0.01. Additionally, the effect size was calculated. All  
87 analysis scripts and results are provided in Supplementary Method S2.

### 88 **Results**

89 Associations between the host characteristics and the proportion of nucleotides at their specific  
90 genomic positions, including both LFV and HFV, were evaluated. Several statistically  
91 significant associations were found (Table S3; Supplementary Method S2), including sample  
92 period and the presence of obesity in the patient. In all cases, two significant associations were  
93 detected at the same position with a different nucleotide. One of the two nucleotides is then  
94 linked to the patient data (i.e., obesity, or sampling period), while the other nucleotide is linked  
95 with to the reverse condition for that characteristic. These two different nucleotides at the same  
96 position always result in synonymous mutations except for the significant associations  
97 observed with the sampling date at HA-411 and NA-418. Table S3 indicates that 32 LFV were  
98 detected at different 16 genomic positions associated with patient data, in addition to the HFV  
99 variants and consensus nucleotide detected at that position.

**Table S3: Statistically significant associations between nucleotides at specific genomic positions and patient data (considering both LFV and HFV).** Results include a description of the functional site of the position, the number of samples that show a LFV (i.e. <50%, excluding 0%), HFV (i.e. ≥50%, excluding 100%) or how many samples that have the nucleotide in the consensus sequence (#CON) (i.e. 100%) at each position for each group of the patient data versus the total number of patients that were included in that respective group of the patient data, the p-value, and the odds ratio. The LFV are the results of the LFV detection approach, while the HFV include the result of subtracting the initial 100% consensus nucleotide by the result of the LFV detection. Most amino acids remain the same at the positions of interest. Positions for which the amino acid changes are highlighted in yellow. The sampling periods are divided in “Beginning”, “Peak”, and “End”. The interpretation of the odds ratio values commonly published in the literature are: <1.68 (small effect), 1.68 - 3.47 (moderate effect) and ≥ 6.71 (large effect) [5]. LFV=Low-frequency variant; HFV=High-frequency variant; AA=Amino acid; CON=Consensus; CI=Confidence interval

| Patient data | Segment       | Nucleotide (AA)                                | Functional site                | Associated with | Number of samples per characteristic |      |       |       | P-value              | Odds Ratio [CI]      |                      |
|--------------|---------------|------------------------------------------------|--------------------------------|-----------------|--------------------------------------|------|-------|-------|----------------------|----------------------|----------------------|
|              |               |                                                |                                |                 | Patient data                         | #LFV | #HFV  | #CON  |                      |                      | #Total               |
| Obesity      | NA            | A1095 (T365)                                   | Catalytic domain [6–11]        | Not obese       | Not obese                            | 0    | 1     | 48    | 53                   | 0.002                | 21.03 [3.21; 180.60] |
|              |               | Obese                                          |                                | Obese           | 1                                    | 0    | 2     | 6     |                      |                      |                      |
|              | G1095 (T365)  | Not obese                                      | Not obese                      | 1               | 0                                    | 4    | 43    | 0.002 |                      |                      |                      |
|              |               | Obese                                          | Obese                          | 0               | 1                                    | 3    | 6     |       |                      |                      |                      |
|              | NP            | A510 (S170)                                    | Not described                  | Obese           | Not obese                            | 1    | 1     | 6     | 53                   | 0.008                | 12.01 [1.99; 94.35]  |
|              |               |                                                |                                | Obese           | Obese                                | 0    | 1     | 3     | 6                    |                      |                      |
|              |               | G510 (S170)                                    | Not obese                      | Not obese       | 1                                    | 1    | 45    | 53    | 0.008                |                      |                      |
|              |               |                                                | Obese                          | Obese           | 1                                    | 0    | 2     | 6     |                      |                      |                      |
|              | C1191 (N397)  | Overlapping NP and PB2 interaction region [12] | Obese                          | Not obese       | 1                                    | 0    | 5     | 53    | 0.003                | 16.31 [2.60; 133.51] |                      |
|              |               |                                                | Obese                          | Obese           | 0                                    | 1    | 3     | 6     |                      |                      |                      |
|              | T1191 (N397)  | Not obese                                      | Not obese                      | 0               | 1                                    | 47   | 53    | 0.003 |                      |                      |                      |
|              |               | Obese                                          | Obese                          | 1               | 0                                    | 2    | 6     |       |                      |                      |                      |
|              | PA            | C135 (C45)                                     | Endonuclease activity [13, 14] | Obese           | Not obese                            | 1    | 0     | 6     | 53                   | 0.005                | 13.95 [2.27; 111.87] |
|              |               |                                                |                                | Obese           | Obese                                | 0    | 1     | 3     | 6                    |                      |                      |
| T135 (C45)   |               | Not obese                                      | Not obese                      | 0               | 1                                    | 46   | 53    | 0.005 |                      |                      |                      |
|              |               | Obese                                          | Obese                          | 1               | 0                                    | 2    | 6     |       |                      |                      |                      |
| C978 (H326)  |               | Not described                                  | Not obese                      | Not obese       | 1                                    | 1    | 45    | 53    | 0.008                | 11.79 [1.95; 91.63]  |                      |
|              |               |                                                | Obese                          | Obese           | 1                                    | 0    | 2     | 6     |                      |                      |                      |
| T978 (H326)  | Not obese     | Not obese                                      | 1                              | 1               | 6                                    | 53   | 0.008 |       |                      |                      |                      |
|              | Obese         | Obese                                          | 0                              | 1               | 3                                    | 6    |       |       |                      |                      |                      |
| A1056 (E352) | Not described | Obese                                          | Not obese                      | 1               | 0                                    | 4    | 53    | 0.002 | 20.98 [3.21; 180.13] |                      |                      |
|              |               | Obese                                          | Obese                          | 0               | 1                                    | 3    | 6     |       |                      |                      |                      |
| G1056 (E352) | Not obese     | Not obese                                      | 0                              | 1               | 48                                   | 53   | 0.002 |       |                      |                      |                      |
|              | Obese         | Obese                                          | 1                              | 0               | 2                                    | 6    |       |       |                      |                      |                      |

|                 |                 |              |                                                |                         |           |           |   |    |    |       |                                                                                                             |                                                                                                             |
|-----------------|-----------------|--------------|------------------------------------------------|-------------------------|-----------|-----------|---|----|----|-------|-------------------------------------------------------------------------------------------------------------|-------------------------------------------------------------------------------------------------------------|
| Sampling period | PB1             | C915 (D305)  | Not described                                  | Not obese               | Not obese | 0         | 1 | 48 | 53 | 0.002 | 21.26 [3.25; 183.85]                                                                                        |                                                                                                             |
|                 |                 | T915 (D305)  |                                                | Obese                   | Not obese | 1         | 0 | 2  | 6  |       |                                                                                                             |                                                                                                             |
|                 |                 | C1293 (Y431) | Not described                                  | Not obese               | Not obese | 0         | 1 | 48 | 53 | 0.002 |                                                                                                             |                                                                                                             |
|                 |                 | T1293 (Y431) |                                                | Obese                   | Not obese | 1         | 0 | 2  | 6  |       |                                                                                                             |                                                                                                             |
|                 | Sampling period | HA           | A411 (K137)                                    | Epitope A [15]          | End       | Beginning | 2 | 0  | 3  | 18    | 0.007                                                                                                       | Beginning vs Peak 4.83 [1.25; 23.24]<br>Beginning vs End 1.91 [.53; 7.50]<br>Peak vs End 9.24 [2.07; 52.09] |
|                 |                 |              | C411 (N137)                                    |                         | Beginning | Beginning | 0 | 2  | 13 | 18    |                                                                                                             |                                                                                                             |
|                 |                 |              |                                                |                         | End       | End       | 0 | 1  | 10 | 16    |                                                                                                             |                                                                                                             |
|                 |                 | NA           | A418 (I140)                                    | Catalytic domain [6–11] | Beginning | Beginning | 0 | 1  | 13 | 18    | 0.007                                                                                                       | Beginning vs Peak 5.75 [1.57; 24.73]<br>Beginning vs End 1.08 [.29; 3.96]<br>Peak vs End 5.33 [1.28; 25.90] |
| C418 (L140)     |                 |              | Peak & End                                     |                         | Beginning | 1         | 0 | 4  | 18 |       |                                                                                                             |                                                                                                             |
| NP              |                 | A531 (G177)  | Not described                                  | Beginning               | Beginning | 2         | 0 | 4  | 18 | 0.007 | Beginning vs Peak 5.63 [1.54; 24.05]<br>Beginning vs End 1.08 [.28; 3.95]<br>Peak vs End 5.23 [1.26; 25.26] |                                                                                                             |
|                 |                 | G531 (G177)  |                                                | Peak & End              | Beginning | 0         | 2 | 12 | 18 |       |                                                                                                             |                                                                                                             |
|                 |                 | A1152 (G384) | Overlapping NP and PB2 interaction region [12] | Peak & End              | Beginning | 0         | 2 | 12 | 18 | 0.007 | Beginning vs Peak 5.61 [1.54; 23.93]<br>Beginning vs End 1.08 [.29; 3.97]<br>Peak vs End 5.19 [1.25; 25.04] |                                                                                                             |
|                 |                 | G1152 (G384) |                                                | Beginning               | Beginning | 2         | 0 | 4  | 18 |       |                                                                                                             |                                                                                                             |
| PA              |                 | A837 (R279)  | PA linker and external linker[16]              | Beginning               | Beginning | 1         | 0 | 4  | 18 | 0.004 | Beginning vs Peak 5.62 [1.54; 24.01]<br>Beginning vs End 1.17 [.31; 4.62]<br>Peak vs End 6.57 [1.56; 32.79] |                                                                                                             |
|                 |                 | G837 (R279)  |                                                | Peak & End              | Beginning | 0         | 1 | 13 | 18 |       |                                                                                                             |                                                                                                             |
|                 |                 | C1320 (S440) | PB1-binding domain [16]                        | Peak & End              | Beginning | 3         | 0 | 4  | 18 | 0.005 | Beginning vs Peak 5.57 [1.53; 23.70]<br>Beginning vs End 1.17 [.31; 4.64]<br>Peak vs End 6.52 [1.55; 32.47] |                                                                                                             |
|                 |                 | T1320 (S440) |                                                | Beginning               | Beginning | 0         | 3 | 11 | 18 |       |                                                                                                             |                                                                                                             |
| PB1             |                 | C141 (H47)   | Not described                                  | Peak & End              | Beginning | 0         | 0 | 4  | 18 | 0.006 | Beginning vs Peak 6.17 [1.66; 27.25]<br>Beginning vs End 1.14 [.30; 4.17]<br>Peak vs End 5.42 [1.29; 26.79] |                                                                                                             |
|                 |                 | T141 (H47)   |                                                | Beginning               | Beginning | 0         | 0 | 14 | 18 |       |                                                                                                             |                                                                                                             |
|                 |                 | A1785 (G595) | Not described                                  | Peak & End              | Beginning | 2         | 0 | 4  | 18 | 0.005 | Beginning vs Peak 5.58 [1.53; 23.73]<br>Beginning vs End 1.14 [.31; 4.49]<br>Peak vs End 6.36 [1.51; 31.55] |                                                                                                             |
|                 |                 | G1785 (G595) |                                                | Beginning               | Beginning | 0         | 2 | 12 | 18 |       |                                                                                                             |                                                                                                             |

## References

1. **Broad Institute.** Picard Tools. <https://broadinstitute.github.io/picard/> (2009, accessed 24 September 2021).
2. **GATK.** MarkDuplicates (Picard). **GATK.** <https://gatk.broadinstitute.org/hc/en-us/articles/360037052812-MarkDuplicates-Picard-> (2021, accessed 27 January 2022).
3. **Marx V.** How to deduplicate PCR. *Nat Methods* 2017;14:473–476.
4. **Boivin G.** Detection and management of antiviral resistance for influenza viruses. *Influenza and other Respiratory Viruses* 2013;7:18–23.
5. **Chen H, Cohen P, Chen S.** How Big is a Big Odds Ratio? Interpreting the Magnitudes of Odds Ratios in Epidemiological Studies. *Communications in Statistics - Simulation and Computation* 2010;39:860–864.
6. **Hirst GK.** ADSORPTION OF INFLUENZA HEMAGGLUTININS AND VIRUS BY RED BLOOD CELLS. *The Journal of experimental medicine* 1942;76:195–209.
7. **Gottschalk A.** Neuraminidase: the specific enzyme of influenza virus and *Vibrio cholerae*. *Biochimica et Biophysica Acta* 1957;23:645–646.
8. **Palese P, Compans RW.** Inhibition of Influenza Virus Replication in Tissue Culture by 2-deoxy-2,3-dehydro-N-trifluoroacetylneuraminic acid (FANA): Mechanism of Action. *Journal of General Virology* 1976;33:159–163.
9. **Russell RJ, Haire LF, Stevens DJ, Collins PJ, Lin YP, et al.** The structure of H5N1 avian influenza neuraminidase suggests new opportunities for drug design. *Nature* 2006;443:45–49.
10. **Webster RG, Laver WG.** Preparation and properties of antibody directed specifically against the neuraminidase of influenza virus. *Journal of immunology (Baltimore, Md : 1950)* 1967;99:49–55.
11. **Varghese JN, Laver WG, Colman PM.** Structure of the influenza virus glycoprotein antigen neuraminidase at 2.9 Å resolution. *Nature* 1983;303:35–40.
12. **Ping J, Keleta L, Forbes NE, Dankar S, Stecho W, et al.** Genomic and Protein Structural Maps of Adaptive Evolution of Human Influenza A Virus to Increased Virulence in the Mouse. *PLoS ONE* 2011;6:e21740.
13. **Dias A, Bouvier D, Crépin T, McCarthy AA, Hart DJ, et al.** The cap-snatching endonuclease of influenza virus polymerase resides in the PA subunit. *Nature* 2009;458:914–918.
14. **Yuan P, Bartlam M, Lou Z, Chen S, Zhou J, et al.** Crystal structure of an avian influenza polymerase PAN reveals an endonuclease active site. *Nature* 2009;458:909–913.
15. **Jorquera PA, Mishin VP, Chesnokov A, Nguyen HT, Mann B, et al.** Insights into the antigenic advancement of influenza A(H3N2) viruses, 2011–2018. *Scientific Reports* 2019;9:2676.
16. **Wang L, Wu A, Wang YE, Quanquin N, Li C, et al.** Functional Genomics Reveals Linkers Critical for Influenza Virus Polymerase. *Journal of Virology* 2016;90:2938–2947.
